# Supplementary material for: Non-covalent interactions in coinage metal complexes of 1,2,4-triazole-based N-heterocyclic carbenes
Source: Royal Society of Chemistry journal article supplement (doi:10.1039/c4dt01994f), 2014-01-01
Supplement: c4dt01994f1.pdf [file c4dt01994f1.pdf]

## Supporting Information

# Non-covalent interactions in coinage metal complexes of 1,2,4-triazole-based *N*-heterocyclic carbenes

Jan Turek,<sup>a</sup> Illia Panov,<sup>b</sup> Petr Švec,<sup>a</sup> Zdeňka Padělková,<sup>a</sup> and Aleš Růžička\*<sup>a</sup>

<sup>a</sup> Department of General and Inorganic Chemistry, Faculty of Chemical Technology, University of Pardubice, Studentská 573, CZ-532 10 Pardubice, Czech Republic.

Fax: +420-466037068; Tel: +420-466037151; E-mail: ales.ruzicka@upce.cz

<sup>b</sup> Department of Organic Chemistry, Faculty of Science, Charles University in Prague, Hlavova 2030/8, CZ-128 43 Prague, Czech Republic.

### Contents

Table S1 - crystallographic parameters

S2

**Table S1.** Crystallographic data for **2, 3, 4, 5, 7, 8** and **9**

| <b>Compound</b>                           | <b>2</b>                                          | <b>3·C<sub>7</sub>H<sub>8</sub></b>                                                  | <b>4·C<sub>6</sub>H<sub>6</sub></b>                                                  | <b>5·0.5 C<sub>6</sub>H<sub>6</sub></b>                                                 |
|-------------------------------------------|---------------------------------------------------|--------------------------------------------------------------------------------------|--------------------------------------------------------------------------------------|-----------------------------------------------------------------------------------------|
| chem formula                              | C <sub>42</sub> H <sub>52</sub> AgIN <sub>8</sub> | C <sub>21</sub> H <sub>26</sub> AuClN <sub>4</sub><br>·C <sub>7</sub> H <sub>8</sub> | C <sub>21</sub> H <sub>26</sub> AuBrN <sub>4</sub><br>·C <sub>6</sub> H <sub>6</sub> | C <sub>21</sub> H <sub>26</sub> AuIN <sub>4</sub><br>·0.5 C <sub>6</sub> H <sub>6</sub> |
| cryst syst                                | monoclinic                                        | monoclinic                                                                           | orthorhombic                                                                         | monoclinic                                                                              |
| space group                               | <i>C2/c</i>                                       | <i>P2<sub>1</sub>/c</i>                                                              | <i>Pca2<sub>1</sub></i>                                                              | <i>P2<sub>1</sub>/c</i>                                                                 |
| a/Å                                       | 21.4227(11)                                       | 14.5680(4)                                                                           | 19.9850(5)                                                                           | 13.95419(10)                                                                            |
| b/Å                                       | 8.8240(4)                                         | 11.8901(10)                                                                          | 8.5330(18)                                                                           | 14.5710(5)                                                                              |
| c/Å                                       | 23.7341(6)                                        | 17.570(1)                                                                            | 31.1480(12)                                                                          | 14.1930(8)                                                                              |
| α/deg                                     | 90                                                | 90                                                                                   | 90                                                                                   | 90                                                                                      |
| β/deg                                     | 111.380(3)                                        | 118.093(4)                                                                           | 90                                                                                   | 119.557(5)                                                                              |
| γ/deg                                     | 90                                                | 90                                                                                   | 90                                                                                   | 90                                                                                      |
| Z                                         | 4                                                 | 4                                                                                    | 8                                                                                    | 4                                                                                       |
| unit cell volume/Å <sup>3</sup>           | 4177.8(3)                                         | 2684.8(3)                                                                            | 5311.7(11)                                                                           | 2436.1(3)                                                                               |
| density/g.cm <sup>-3</sup>                | 1.437                                             | 1.630                                                                                | 1.724                                                                                | 1.901                                                                                   |
| abs coeff, μ/mm <sup>-1</sup>             | 1.26                                              | 5.60                                                                                 | 7.07                                                                                 | 7.32                                                                                    |
| F(000)                                    | 1840                                              | 1304                                                                                 | 2688                                                                                 | 1332                                                                                    |
| h; k; l – min, max                        | -27, 25; -10, 11;<br>-30, 30                      | -18, 18; -14, 15;<br>-22, 19                                                         | -25, 19; -10, 10;<br>-38, 36                                                         | -17, 14; -18, 18;<br>-17, 18                                                            |
| θ <sub>min; max</sub> /deg                | 1.8; 27.5                                         | 2.2; 27.5                                                                            | 4.1; 26.4                                                                            | 1.7; 27.5                                                                               |
| reflections                               | 19021                                             | 26335                                                                                | 46503                                                                                | 20514                                                                                   |
| total (R <sub>int</sub> ) <sup>a</sup>    | 4705 (0.038)                                      | 6121 (0.110)                                                                         | 10365 (0.152)                                                                        | 5559 (0.060)                                                                            |
| observed [I>2σ(I)]                        | 3950                                              | 5108                                                                                 | 9472                                                                                 | 4762                                                                                    |
| no. of parameters                         | 236                                               | 307                                                                                  | 569                                                                                  | 271                                                                                     |
| max/min ρ/eÅ <sup>-3</sup>                | 1.15; -1.08                                       | 4.33; -2.44                                                                          | 2.17; -2.15                                                                          | 6.43; -2.28                                                                             |
| goodness of fit on F <sup>2b</sup>        | 1.10                                              | 1.13                                                                                 | 1.09                                                                                 | 1.08                                                                                    |
| final R1 values<br>(I>2σ(I)) <sup>c</sup> | 0.040                                             | 0.041                                                                                | 0.047                                                                                | 0.044                                                                                   |
| final wR2 values<br>(I>2σ(I))             | 0.087                                             | 0.117                                                                                | 0.121                                                                                | 0.113                                                                                   |

<sup>a</sup>  $R_{\text{int}} = \sum |F_o^2 - F_{o,\text{mean}}^2| / \sum F_o^2$ . <sup>b</sup>  $S = [\sum (w(F_o^2 - F_c^2)^2) / (N_{\text{diff.}} - N_{\text{param.}})]^{1/2}$ . <sup>c</sup> Weighting scheme :  $w = [\sigma^2(F_o^2) + (w_1P)^2 + w_2P]^{-1}$ , where  $P = [\max(F_o^2) + 2F_c^2]$ ,  $R(F) = \sum ||F_o| - |F_c|| / \sum |F_o|$ ,  $wR(F^2) = [\sum (w(F_o^2 - F_c^2)^2) / (\sum w(F_o^2)^2)]^{1/2}$

**Table S1** continued

| Compound                                                                     | 7                                                  | 8                                                  | 9Cu/Br·C <sub>4</sub> H <sub>8</sub> O                                                                                       |
|------------------------------------------------------------------------------|----------------------------------------------------|----------------------------------------------------|------------------------------------------------------------------------------------------------------------------------------|
| chem formula                                                                 | C <sub>19</sub> H <sub>21</sub> AgClN <sub>3</sub> | C <sub>19</sub> H <sub>21</sub> AuClN <sub>3</sub> | C <sub>19</sub> H <sub>21</sub> Br <sub>0.5</sub> Cl <sub>0.5</sub> CuN <sub>3</sub><br>·1.5 C <sub>4</sub> H <sub>8</sub> O |
| cryst syst                                                                   | triclinic                                          | triclinic                                          | monoclinic                                                                                                                   |
| space group                                                                  | <i>P</i> -1                                        | <i>P</i> -1                                        | <i>P</i> 2 <sub>1</sub> / <i>c</i>                                                                                           |
| <i>a</i> /Å                                                                  | 8.9450(3)                                          | 8.9260(3)                                          | 9.2450(9)                                                                                                                    |
| <i>b</i> /Å                                                                  | 10.9861(7)                                         | 11.0071(6)                                         | 16.2720(14)                                                                                                                  |
| <i>c</i> /Å                                                                  | 10.9950(6)                                         | 11.0108(8)                                         | 17.9170(5)                                                                                                                   |
| $\alpha$ /deg                                                                | 62.599(4)                                          | 62.047(5)                                          | 90                                                                                                                           |
| $\beta$ /deg                                                                 | 72.338(3)                                          | 71.966(6)                                          | 111.442(4)                                                                                                                   |
| $\gamma$ /deg                                                                | 80.124(3)                                          | 80.177(5)                                          | 90                                                                                                                           |
| <i>Z</i>                                                                     | 2                                                  | 2                                                  | 4                                                                                                                            |
| unit cell volume/Å <sup>3</sup>                                              | 913.39(8)                                          | 908.82(10)                                         | 2508.8(3)                                                                                                                    |
| density/g.cm <sup>-3</sup>                                                   | 1.581                                              | 1.914                                              | 1.283                                                                                                                        |
| abs coeff, $\mu$ /mm <sup>-1</sup>                                           | 1.25                                               | 8.25                                               | 1.74                                                                                                                         |
| F(000)                                                                       | 440                                                | 504                                                | 1004                                                                                                                         |
| <i>h</i> ; <i>k</i> ; <i>l</i> – min, max                                    | -10, 11; -14, 14;<br>-14, 14                       | -11, 11; -14, 14;<br>-14, 14                       | -12, 11; -21, 20;<br>-23, 23                                                                                                 |
| $\theta_{\min, \max}$ /deg                                                   | 2.1; 27.5                                          | 3.2; 28.5                                          | 4.2; 26.4                                                                                                                    |
| reflections                                                                  | 19018                                              | 19132                                              | 23685                                                                                                                        |
| total ( <i>R</i> <sub>int</sub> ) <sup>a</sup>                               | 4169 (0.035)                                       | 4560 (0.060)                                       | 5080 (0.049)                                                                                                                 |
| observed [ <i>I</i> >2 $\sigma$ ( <i>I</i> )]                                | 3963                                               | 4364                                               | 4206                                                                                                                         |
| no. of parameters                                                            | 217                                                | 217                                                | 281                                                                                                                          |
| max/min $\rho$ /e Å <sup>-3</sup>                                            | 1.84; -0.86                                        | 1.48; -2.22                                        | 0.48; -0.45                                                                                                                  |
| goodness of fit on F <sup>2b</sup>                                           | 1.07                                               | 1.13                                               | 1.09                                                                                                                         |
| final <i>R</i> 1 values<br>( <i>I</i> >2 $\sigma$ ( <i>I</i> )) <sup>c</sup> | 0.032                                              | 0.024                                              | 0.042                                                                                                                        |
| final w <i>R</i> 2 values<br>( <i>I</i> >2 $\sigma$ ( <i>I</i> ))            | 0.092                                              | 0.062                                              | 0.102                                                                                                                        |

<sup>a</sup>  $R_{\text{int}} = \sum |F_o^2 - F_{o,\text{mean}}^2| / \sum F_o^2$ . <sup>b</sup>  $S = [\sum (w(F_o^2 - F_c^2)^2) / (N_{\text{diff.}} - N_{\text{param.}})]^{1/2}$ . <sup>c</sup> Weighting scheme :  $w = [\sigma^2(F_o^2) + (w_1P)^2 + w_2P]^{-1}$ , where  $P = [\max(F_o^2) + 2F_c^2]$ ,  $R(F) = \sum ||F_o| - |F_c|| / \sum |F_o|$ ,  $wR(F^2) = [\sum (w(F_o^2 - F_c^2)^2) / (\sum w(F_o^2)^2)]^{1/2}$
